# Supplementary material
Source: PubMed Central journal article supplement (PMC3714021)

## Supplementary Materials

**Supplementary Figure 1.** Biopsy records used in analysis of benign breast disease, breast density, and risk of breast cancer, Breast Cancer Surveillance Consortium, 1994-2009.

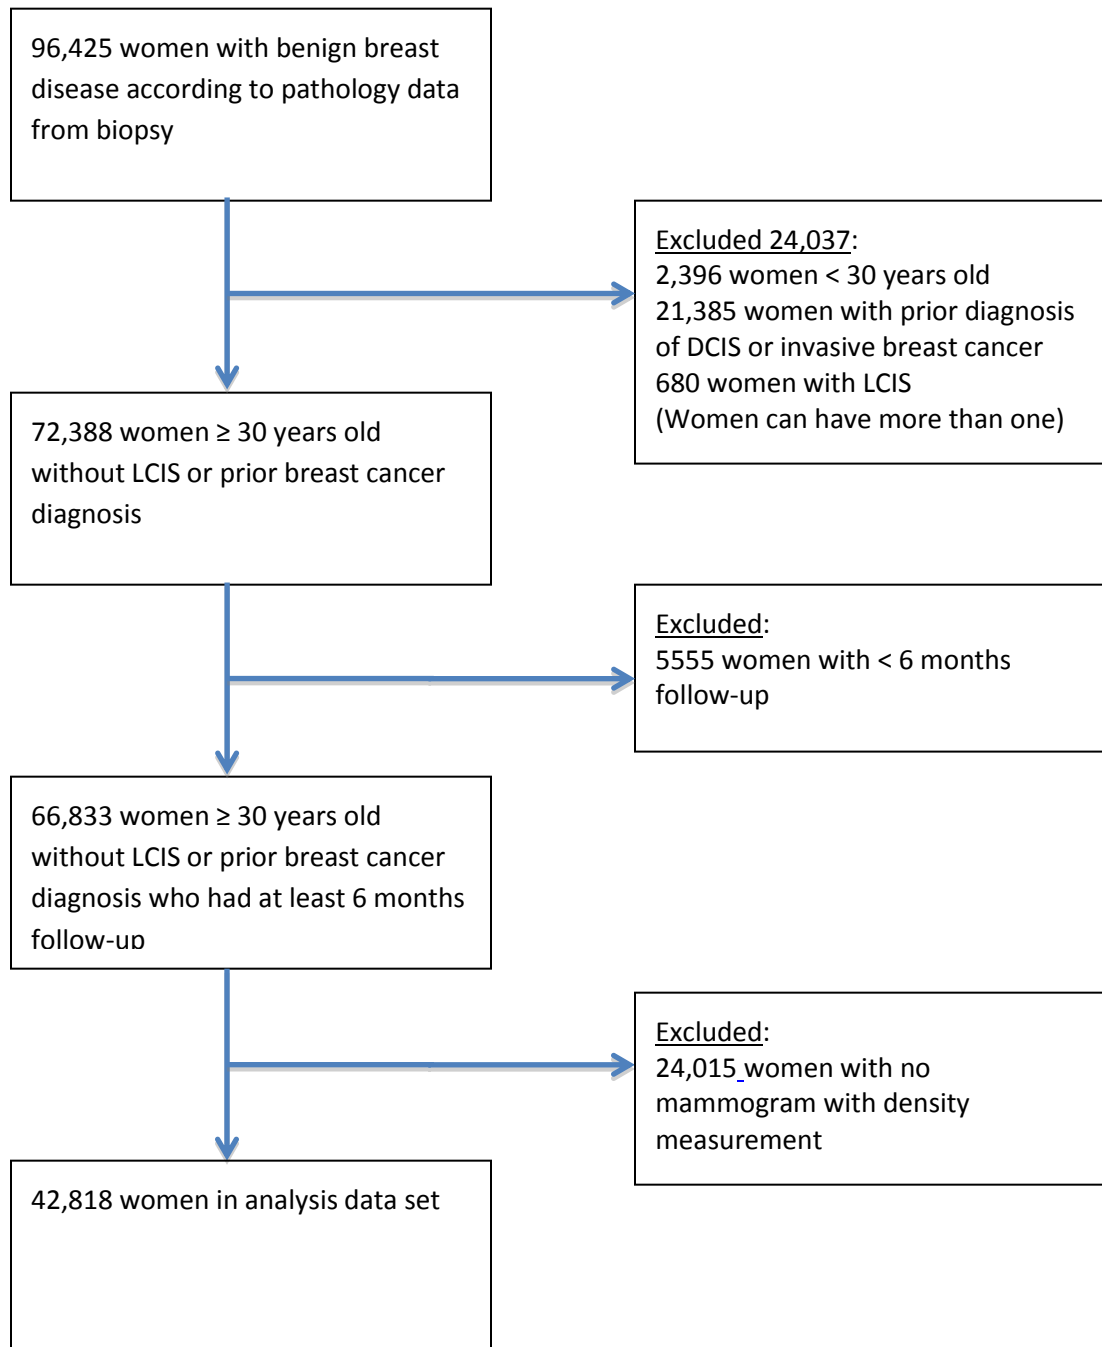

Supplement: supp_djt124_jnci_JNCI_12_1891_s01.pdf [file supp_djt124_jnci_JNCI_12_1891_s01.pdf]
